# 1 **REPLICCAR II Study: Data Quality Audit in the Paulista Cardiovascular Surgery**

## 2 Registry

3 Bianca Maria Maglia Orlandi, MSc<sup>a,b</sup>, Omar Asdrubal VilcaMejia, MD, PhD<sup>a,b</sup>, Maxim Goncharov, MD<sup>a,b</sup>, Kenji  
4 Nakahara Rocha, BSc<sup>a,b</sup>, Lucas Bassolli<sup>a,b</sup>, Luiz AF Lisboa, MD PhD<sup>a,b</sup>, Luis AO Dallan<sup>a,b</sup>, Fábio B Jatene, MD,  
5 PhD<sup>a,b</sup>

6 <sup>a</sup>REPLICCAR II Study Group

7 <sup>b</sup>Instituto do Coração do Hospital das Clínicas da Faculdade de Medicina do Estado de São Paulo (INCOR). Av.  
8 Dr. Enéas Carvalho de Aguiar, 44 - Cerqueira César, São Paulo - SP, 05403-900 – Brazil.

9

## 10 **Corresponding author**

11 Omar Asdrubal Vilca Mejia, MD, PhD<sup>1</sup>

12 Av. Dr. Enéas Carvalho de Aguiar, 44 - Cerqueira César, São Paulo - SP, 05403-900 – Brazil

13 Telephone: +55 11 2661-5000

14 E-mail: [omarvmejia@gmail.com](mailto:omarvmejia@gmail.com)

15

## 16 **Abstract**

17 **Background:** Electronic health records databases are important sources of data for research  
18 and health practice. The aim of this study was to assess the quality of the data in  
19 REPLICCAR II, the Brazilian cardiovascular surgery database based in São Paulo State.

20 **Study Design:** The REPLICCAR II database contains data from 9 institutions in São Paulo,  
21 with more than 700 variables. We audited data entry at 6 months (n=107 records) and 1 year  
22 (n=2229 records) after the start of data collection. We present a modified Aggregate Data  
23 Quality Score (ADQ) for 30 variables in this analysis.

24 **Results:** The agreement between the data independently entered by a database operator  
25 and a researcher was good for categorical data (Cohen  $\kappa$  = 0.70, 95%CI 0.59, 0.83). For  
26 continuous data, the intraclass coefficient was high for all variables, with only 2 of 15  
27 continuous variables having an ICC of less than 0.90. In an indirect audit, 74% of the  
28 selected variables (n = 23) showed a good ADQ score, regarding completeness and  
29 reliability.

30 **Conclusions:** Data entry in the REPLICCAR II database is satisfactory and can provide  
31 accurate and reliable data for research in cardiovascular surgery in Brazil.

32

33 **Keywords:** Cardiac Surgery - Database - Quality Improvement

34

35 Abbreviations: ADQ = Aggregate Data Quality Score; CABG = coronary artery bypass graft;  
36 ESTS = European Society of Thoracic Surgeons; ICC = Intra Class Correlation Coefficient.

37

## 38 **Introduction**

39 The very foundation in Healthcare Science of its clinical studies, trials, and follow-ups  
40 is the quality of the data collected. Despite the lack of consensus regarding a standardized  
41 method to measure healthcare data quality, it is of utmost importance to establish the  
42 confidence and validity of the outcome. Hence, the research design, the variable selection  
43 and the gathering of the data are pivotal points to assert the reliability of the conclusion  
44 achieved<sup>1</sup>.

45 As we may all know, observational studies are subject to bias, confounding, and a  
46 badly established retrospective registry. Publications like Zhang et al., 2014, Salati et al.,  
47 2016, and Dreyer et al., 2016 reported various approaches on how to devise data validation  
48 tools aimed at guaranteeing the quality of the results needed for decision making<sup>2-5</sup>. In the  
49 same way, the developing of reliable databases in healthcare is essential, because they will  
50 not only be used as the basis for much academic research, but also to evaluate and derive  
51 guidelines, leading to the improvement of healthcare decision making<sup>6-10</sup>. In the  
52 Cardiovascular and Thoracic Surgery field, the initiatives taken by the STS and European  
53 Society of Thoracic Surgeons (ESTS) Databases should, thus, be emphasized, because they  
54 both have aimed, since their inception, at gathering not only massive but also reliable data.  
55 This has direct implications for clinical outcomes, especially regarding mortality. The classical  
56 paradigm between volume and successful outcomes in cardiovascular surgery is currently  
57 being questioned regarding low-volume and quality emphasis programs<sup>11-18</sup>, with some

58 showing that just adhering to a quality improvement initiative could already impact mortality  
59 rates<sup>19</sup>.

60 The development of the Paulista Registry of Cardiovascular Surgery (REPLICCAR II),  
61 a multicenter prospective cohort study coordinated by the Instituto do Coração do Estado de  
62 São Paulo (InCor) aimed at evaluating morbidity and mortality predictors in patients  
63 undergoing coronary artery bypass graft (CABG) surgery and constitutes a definite example  
64 of the concept. Data collection and analysis were performed according to its guidelines set by  
65 professionals from different areas forming an interface between research and clinical  
66 practice. The adoption of quality-oriented data analysis then becomes imperative to assure  
67 the validity of its outcomes with the intent of enhancing its prospective clinical impact<sup>6</sup>.

68 The aim of the present study was to present the results of direct and indirect audits of  
69 the data quality of the registries included in the REPLICCAR II database after 6 months and  
70 1 year.

71

## 72 **Material and Methods**

### 73 Data source and collection

74 This project included 9 institutions in the State of São Paulo: (i) Instituto do Coração do  
75 Hospital das Clínicas da Faculdade de Medicina da USP (InCor), (ii) Hospital Beneficência  
76 Portuguesa de São Paulo (Hospital BP), (iii) Hospital TotalCor, (iv) Hospital de Base de São  
77 José do Rio Preto (HBSJRP), (v) Hospital Albert Einstein da Sociedade Beneficente Israelita  
78 Brasileira (HIAE), (vi) Instituto Dante Pazzanese de Cardiologia (IDP), (vii) Santa Casa de  
79 Misericórdia de São Paulo (SCSP), (viii) Santa Casa de Misericórdia de Marília, and (ix)  
80 Hospital de Clínicas da Universidade Estadual de Campinas (HC-UNICAMP). The study thus  
81 strived to analyze public and private reference hospitals linked to institutions like  
82 philanthropic organizations and universities.

83 REPLICCAR II includes more than 700 variables, among which are factors related to  
84 general facts about the patients, their pre-, intra-, and postoperative assessments and their  
85 30-day follow-up. Data for this study began being collected in August 2017, with each

86 participant center responsible for mobilizing a team for the task, as well as being free to  
87 designate the person responsible, usually a medical resident. All researchers responsible for  
88 the gathering were previously trained on how to fill out the forms correctly.

89 Data gathering was performed by using the online platform REDCap-HCFMUSP  
90 (Vanderbilt, Tennessee, EUA/<https://redcap.hc.fm.usp.br/>), accessible from any computer  
91 with an internet connection, with access restricted to selected researchers. The data are  
92 stored in real time at a safe server at the University of São Paulo Medical School. This  
93 project was approved by this institution's ethics committee, under the protocol number  
94 2016/15163-0. Funding was provided by FAPESP (PPSUS).

95

#### 96 Direct audit

97 A direct audit was carried out after 6 months of data collection; 7% (107 records) of the data  
98 collected at each center until February 2018 was randomly selected with STATA 13.1  
99 software (StataCorp, Texas, USA), and for re-collection as performed by experienced  
100 independent investigators (auditors) within the team, who visited each center for this task.  
101 The auditors, with full access to each center's own previously available database, re-  
102 collected these data, under two fundamental conditions: (i) that they were blinded to the  
103 original record and (ii) that each one did not re-collect the same data they had originally  
104 input. The original and the re-collected data then underwent statistical analysis to check for  
105 accuracy in data collection.

106

#### 107 Indirect audit

108 After 1 year of data collection, due to the amount of data and the lack of financial and human  
109 resources, a direct audit was impractical. Thus, an indirect audit was performed. This time, all  
110 the 2229 records were analyzed, and 30 variables related to pre-, intra-, and postoperative  
111 factors were selected. These data then underwent statistical analysis.

112 .

#### 113 Statistical analysis

114 For the direct audit, the data were analyzed using the program STATA version 13.1  
115 (StataCorp, Texas, USA). Cohen's *kappa* coefficient ( $\kappa$ ) was taken for categorical variables to  
116 estimate the change in agreement occurring simply at random between raters and the  
117 observed variables.

118 *Kappa coefficient* ( $\kappa$ ) was reported as<sup>7</sup>: (i) fair, when between 0.21 and 0.40; (ii) moderate,  
119 when between 0.41 and 0.60; (iii) substantial, when between 0.61 and 0.80; and (iv) almost  
120 perfect, when between 0.81 and 1.00<sup>7</sup>. The Intra Class Correlation Coefficient (ICC) was  
121 determined for continuous data variables by the assumptions of raters with similar  
122 characteristics and for evaluating rater-based clinical assessment methods (2-way Random-  
123 Effects Model for reliability of agreement). ICC varies between 0 and 1, with the first one  
124 suggesting no agreement, whereas the second one suggests perfect agreement. Values  
125 lower than 0.50 are indicative of poor reliability. Those between 0.5 and 0.75 were  
126 considered moderate, those between 0.75 and 0.9 good, and those higher than 0.90 were  
127 considered of excellent reliability<sup>8</sup>.

128 For the indirect audit, we focused on the analysis of the completeness and reliability  
129 of all the data included in REDCap. In this way, we adapted the methodology suggested by  
130 Salati et al, implemented by the REPLICAR II responsible team as follows<sup>3</sup>:

131 **Completeness (COM)** =  $(1 - [\text{'null values'}/\text{total expected values}]) \times 100$

132 **Reliability (REL)** =  $(1 - [\text{'inconsistent values'}/\text{total expected values}]) \times 100$

133 **Rescaled COM** = COM of the Unit – (average COM of all the examined Units/standard  
134 deviation of all the examined Units)

135 **Rescaled REL** = REL of the Unit – (average REL of all the examined Units/standard  
136 deviation of all the examined Units)

137 **Aggregate Data Quality Score (ADQ) = Rescaled COM + Rescaled REL**

138 The ADQ value illustrates the final score for both completeness and reliability. Thus,  
139 the closer it gets to zero, the closer the data will be to the expected average, showing the  
140 quality of data in a simplified way.

141

142 **Results**

143 Direct auditing

144 A total of 107 random records for direct data analysis collected in the initial 6 months  
145 of the REPLICCAR II Study (10% of the total sample) were audited. Table 1 summarizes the  
146 data of the direct audit of the variables selected for analysis. The observed inter-rater  
147 agreement occurring by chance (randomly) had an average  $\kappa$  of 0.70, with a standard error of  
148 0.06 (95%CI 0.59-0.83). The analysis of each variable was mostly substantial ( $n = 4$ ) to  
149 almost perfect ( $n = 3$ )  $\kappa$  coefficient, whereas 2 variables had a moderate  $\kappa$  coefficient.

**Table 1.** Direct Audit: Inter-Rater Agreement and Estimated  $\kappa$  coefficient of categorical variables. REPLICCAR II, 2019.

| Variables                         | Inter-Rater Agreement (%) | Estimated $\kappa$ (SE) |
|-----------------------------------|---------------------------|-------------------------|
| Family history CHD                | 91.7                      | 0.62 (0.10)             |
| <i>Diabetes mellitus</i>          | 96.3                      | 0.93 (0.09)             |
| <i>Diabetes treatment</i>         | 87.3                      | 0.76 (0.11)             |
| Dyslipidemia                      | 88.8                      | 0.78 (0.09)             |
| Renal Failure                     | 92.1                      | 0.42 (0.09)             |
| Dialysis                          | 100                       | 1.00 (0.10)             |
| Hypertension                      | 97.3                      | 0.86 (0.09)             |
| Intra operative blood transfusion | 91.67                     | 0.75 (0.10)             |
| Complications post op             | 75                        | 0.47 (0.09)             |

CHD: Coronary Heart Disease.

150 Table 2 presents the Intraclass Correlation Coefficient, analyzing the acceptable  
151 reliability of the direct audited variables. Preoperative hemoglobin had an average ICC of  
152 0.70, but it later became clear that there were many different admissions in laboratory  
153 examinations, hence promoting disagreement about this situation.

154

155

156

157

**Table 2.** Direct Audit: Intraclass Correlation Coefficient (ICC) of numerical variables with, two-way random effects model. REPLICCAR II, 2019.

| Variables                           | ICC<br>(Average) | 95% CI        |
|-------------------------------------|------------------|---------------|
| <b>Pre-op</b>                       |                  |               |
| Age                                 | 0.86             | 0.80 – 0.91   |
| Height (cm)                         | 0.98             | 0.96 – 0.98   |
| Weight (kg)                         | 0.99             | 0.98 – 0.99   |
| Preoperative Hemoglobin (mg/dL)     | 0.70             | -3.7 – 0.98   |
| Preoperative Glucose (mg/dL)        | 0.99             | 0.98 – 1.00   |
| Preoperative Ejection Fraction (%)  | 0.99             | 0.98 – 0.99   |
| <b>Intra-op</b>                     |                  |               |
| Lowest Intraop Hematocrit (%)       | 0.98             | 0.96 – 0.99   |
| Highest Intraop Glucose (mg/dL)     | 0.97             | 0.96 – 0.98   |
| Intraop Perfusion time (min)        | 0.99             | 0.98 – 0.99   |
| Intraop Anoxia time (min)           | 0.99             | 0.996 – 0.998 |
| <b>Post-op</b>                      |                  |               |
| Postoperative Ejection Fraction (%) | 0.94             | 0.80 - 0.98   |
| Postoperative Glucose (mg/dL)       | 1.00             | 0.997- 0.99   |
| Postoperative Hematocrit (%)        | 0.98             | 0.95 – 0.99   |

158

159 In this sample, the data for glycated hemoglobin, total bilirubin, and albumin levels  
 160 were insufficient for analysis, but these variables are not mandatory in the registry.

161 Indirect auditing

162 After 1 year of data collection, an indirect audit was conducted, regarding  
 163 completeness and reliability for 30 variables selected as relevant for risk analysis for CABG  
 164 mortality.

165

166

167

168

169

170

171

172

173 Table 3. Aggregate Data Quality (ADQ) composite of completeness and reliability of REPLICCAR II  
 174 database, 2019.

| Variables | COM(%) | Rescaled<br>COM | REL (%) | Rescaled<br>REL | ADQ |
|-----------|--------|-----------------|---------|-----------------|-----|
|-----------|--------|-----------------|---------|-----------------|-----|

| <b>Pre-Op</b>                             |             |       |       |       |       |
|-------------------------------------------|-------------|-------|-------|-------|-------|
| Age (years)                               | 97.25       | 0.54  | 99.81 | -0.50 | 0.03  |
| BMI (kg/cm <sup>2</sup> )                 | 96.71       | 0.51  | 98.55 | -5.29 | -4.78 |
| Family history CHD                        | 97.90       | 0.56  | 100   | 0.23  | 0.80  |
| <i>Diabetes mellitus</i>                  | 98.06       | 0.57  | 100   | 0.23  | 0.80  |
| <i>Diabetes</i> treatment                 | 95.99       | 0.48  | 100   | 0.23  | 0.72  |
| Dyslipidemia                              | 97.45       | 0.54  | 100   | 0.23  | 0.78  |
| Renal Failure                             | 97.80       | 0.56  | 100   | 0.23  | 0.79  |
| Dialysis                                  | 97.93       | 0.56  | 100   | 0.23  | 0.80  |
| Hypertension                              | 97.93       | 0.56  | 100   | 0.23  | 0.80  |
| Rheumatic Disease                         | 96.35       | 0.50  | 100   | 0.23  | 0.73  |
| Hemoglobin (mg/dL)                        | 92.70       | 0.35  | 100   | 0.23  | 0.59  |
| Hematocrit (%)                            | 92.47       | 0.34  | 100   | 0.23  | 0.58  |
| Total Albumin (g/L)                       | 21.77       | -2.51 | 100   | 0.23  | -2.28 |
| Total Bilirubin (mg/dL)                   | 14.02       | -2.82 | 100   | 0.23  | -2.59 |
| Glucose (mg/dL)                           | 60.50       | -0.95 | 100   | 0.23  | -0.71 |
| HbA1c                                     | 41.73       | -1.70 | 100   | 0.23  | -1.47 |
| Ejection fraction (%)                     | 75.13       | -0.36 | 100   | 0.23  | -0.12 |
| Creatinine (mg/dL)                        | 92.89       | 0.36  | 100   | 0.23  | 0.59  |
| <b>Intra-Op</b>                           |             |       |       |       |       |
| Hemoglobin (smaller)                      | 96.87       | 0.52  | 100   | 0.23  | 0.75  |
| Hematócrito (smaller)                     | 96.90       | 0.52  | 100   | 0.23  | 0.75  |
| Glucose (higher)                          | 96.61       | 0.51  | 100   | 0.23  | 0.74  |
| Blood transfusion                         | 95.93       | 0.48  | 100   | 0.23  | 0.72  |
| <b>Post- Op</b>                           |             |       |       |       |       |
| Ejection fraction (%)                     | 22.32       | -2.49 | 100   | 0.23  | -2.25 |
| Glucose (mg/dL)                           | 73.87       | -0.41 | 100   | 0.23  | -0.17 |
| Creatinine (mg/dL)                        | 94.93       | 0.44  | 100   | 0.23  | 0.68  |
| Hemoglobin (mg/dL)                        | 90.02       | 0.24  | 100   | 0.23  | 0.48  |
| Hematocrit (%)                            | 90.05       | 0.24  | 100   | 0.23  | 0.48  |
| Post Op Complications                     | 95.70       | 0.47  | 100   | 0.23  | 0.71  |
| Post Op duration <sup>†</sup>             | 95.28       | 0.46  | 100   | 0.23  | 0.69  |
| Hospitalization total (days) <sup>†</sup> | 95.28       | 0.46  | 99.94 | -0.01 | 0.44  |
| Mortality (OUTCOME)                       | 94.93       | 0.44  | 99.81 | -0.50 | -0.06 |
| <b>Média</b>                              | 83.98       |       | 99.94 |       |       |
| <b>Standard Deviation</b>                 | 24,79399493 |       | 0.26  |       |       |

† Calculated fields.

175

176 Table 3 provides completeness and reliability of the variables included for the current

177 evaluation and the ADQ of the study. Among the variables with less than 90% completeness

178 (COM) and low ADQ score in the preoperative period were (i) total bilirubin (14.02%), (ii) total

179 albumin (21.77%), (iii) *HbA1c* (41.73%), (iv) glucose (60.50%), and (v) ejection fraction

180 (75.13%). In the postoperative period, there were only 2 variables in this condition: (i)

181 ejection fraction (22.32%) and (ii) glucose (73.87%). The ADQ score for BMI on the other



182 hand, was -4.7 but was related to the reliability. The remaining variables had more than 90%  
183 completeness and reliability.

184 Figure 1. ADQ scale for the variables analyzed in the indirect audit. REPLICCAR II, 2019.

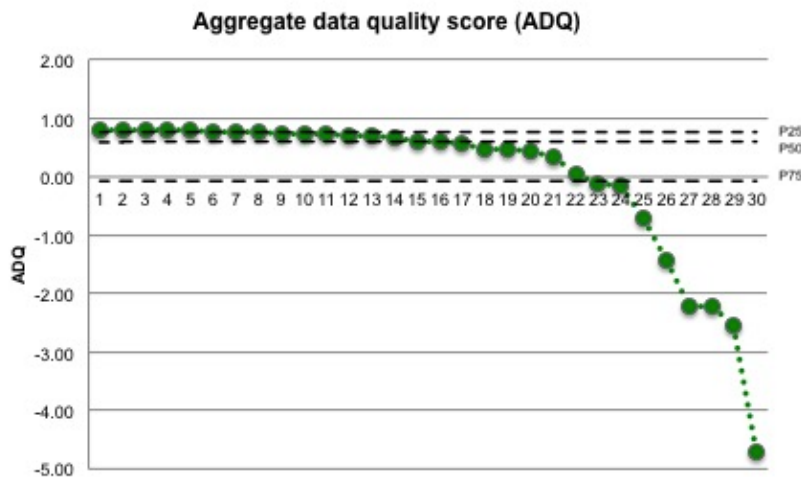

185

186

187 Figure 1 shows that 74% of the records (n = 23) had an acceptable ADQ score,  
188 considering that the positive values had an ADQ score larger than the sample mean, which  
189 can be considered as good data quality. The values under the first quartile were considered  
190 relevant for review.

191 We propose criteria and definitions (Table 4) for some variables in the REDCap tool,  
192 including the BMI variable, with ranges for weight and height. The investigators will then  
193 receive an alert for each data imputation when the data are out of these determined values,  
194 thus, guaranteeing better reliability, data consistency, and acceptable ranges. The other  
195 variables with low completeness are not mandatory but reflect our reality.

196

197

198

199

200

201 Table 4. Rules applied to the RedCAP tools after the indirect audit considering better criteria  
202 and definitions to improve data quality in REPLICCAR II Study, 2019.

| Field Label                     | Choices, Calculations, OR Slider Labels                                                                                  | Validation Type | Validation Min | Validation Max | Branching Logic (Show field only if...) |
|---------------------------------|--------------------------------------------------------------------------------------------------------------------------|-----------------|----------------|----------------|-----------------------------------------|
| Age                             | round (datediff([dob], [surgdt], "y", "dmy"))                                                                            | number          |                |                |                                         |
| Gender                          | 1, Male   2, Female                                                                                                      |                 |                |                |                                         |
| Admission date                  |                                                                                                                          | date_dmy        | 01/08/17       |                |                                         |
| Height (cm)                     |                                                                                                                          | number          | 120            | 250            |                                         |
| Weight (Kg)                     |                                                                                                                          | number          | 30             | 300            |                                         |
| BMI                             | round ([weightkg]*10000/([heightcm]*[heightcm]))                                                                         |                 |                |                |                                         |
| Family History CHD              | 1, Yes   2, No                                                                                                           |                 |                |                |                                         |
| Diabetes mellitus               | 1, Yes   2, No   3, Unknown                                                                                              |                 |                |                |                                         |
| Diabetes Control                | 0, No control   1, Diet   2, Oral   3, Insulin   4, Others subcutaneous   5, Others not subcutaneous   6, Unknown        | autocomplete    |                |                | [diabetes] = '1'                        |
| Dislipidemia                    | 1, Yes   2, No   3, Unknown                                                                                              |                 |                |                |                                         |
| Renal Failure                   | 1, Chronic   2, Acute   3, No   4, Unknown                                                                               |                 |                |                |                                         |
| Dialysis                        | 1, Yes   2, No                                                                                                           |                 |                |                |                                         |
| Hypertension                    | 1, Yes   2, No   3, Unknown                                                                                              |                 |                |                |                                         |
| Rheumatic Disease               | 1, Yes   2, No   3, Unknown                                                                                              |                 |                |                |                                         |
| Hemoglobin (mg/dL)              |                                                                                                                          | number          | 5              | 20             |                                         |
| Hematocrit (%)                  |                                                                                                                          | number          | 15             | 70             |                                         |
| Last creatinin (mg/dL)          |                                                                                                                          | number          | 0.1            | 30             |                                         |
| Creatinin clearance             | round (if([sex]=1,((140-[age])*[weight]/(72*[creatin])), if([sex]=2,((140-[age])*[weight]*0.85/(72*[creatin])), "NaN"))) | number          |                |                |                                         |
| Total Albumin (g/L)             |                                                                                                                          | number          | 1              | 10             |                                         |
| Total Bilirrubin (mg/dL)        |                                                                                                                          | number          | 0.1            | 10             |                                         |
| Glucose (mg/dL)                 |                                                                                                                          | number          | 20             | 500            |                                         |
| HbA1c                           |                                                                                                                          | number          | 1              | 20             |                                         |
| Lowest Intraop Hemaglobin       |                                                                                                                          | number          | 1              | 50             |                                         |
| Lowest Intraop Hematocrit (%)   |                                                                                                                          | number          | 1              | 99.99          |                                         |
| Highest Intraop Glucose (mg/dL) |                                                                                                                          | number          | 40             | 500            |                                         |
| ICU stay (hours)                | round (sum([icuduration], [icudhrs], "h", "dmy", true))                                                                  | number          |                |                | [icuvist] = '1'                         |
| Mortality                       | 1, Yes   2, No                                                                                                           |                 |                |                | [icuvist]= '2'                          |
| Date of death                   |                                                                                                                          | date_dmy        |                |                | [mtpd]= '1'                             |
| Survival (days)                 | round (datediff([surgdt],[mtdate], "d", "dmy"))                                                                          | number          |                |                |                                         |
| Hospitalization total (days)    | round (datediff([admitdt],[dischdt],"d","dmy",true))                                                                     | number          |                |                |                                         |
| Post Op duration (days)         | round (datediff([surgdt],[dischdt],"d","dmy",true))                                                                      | number          |                |                |                                         |
| Date of Birth                   |                                                                                                                          | date_dmy        |                |                |                                         |
| Surgery Date                    |                                                                                                                          | date_dmy        |                |                |                                         |
| Hospital Discharge Date         |                                                                                                                          | date_dmy        |                |                |                                         |
| Date of Death                   |                                                                                                                          | date_dmy        |                |                | [mtpd]= '1'                             |

BMI: Body Mass Index; CHD: Coronary Heart Disease; creatin: last creatinin; ICU: Intensive Care Unit; icuvist: Entrance in ICU after Surgery; dob: date of birth; admitdt: admission date; surgdt: surgery date; dischdt: discharge date; mtdate: date of death; dmy: date/month/year.

203

204 In summary, the REPLICCAR II study had satisfactory concordance and correlation in

205 the first stage. However, the results of the indirect analysis were essential to develop

206 methods for data confidence and quality improvement.

207

208

209 **Discussion**

210 The outcome variable (operative death) had 85% completeness and 92% reliability. Among  
211 the inconsistencies related to mortality, we verified that the cases of intraoperative death  
212 were negligible for the variable operative death. To rectify such in reliability, we inserted in  
213 the system a script that considers the cases of surgery without admission to the intensive  
214 care unit at the immediate postoperative period to count as death on the day of surgery.  
215 “Mortality in Hospital” or “30-Day Vital Status” had 96% completeness and 99.7% reliability.

216 Patients with unknown or incomplete 30-day mortality status could potentially  
217 introduce bias. However, “in-hospital mortality” completeness was almost fully recorded, and  
218 represents the vast majority of 30-day deaths. The use of simulations suggests that any  
219 errors committed by the false assumption that a patient with missing or unknown mortality  
220 status is alive have negligible influence on hospital mortality results, compared with random  
221 sampling error<sup>14</sup>; however, that doesn’t mean the registry is completely biased or inconsistent  
222 with reality.

223 The STS established a conceptual framework of quality measurement in Adult  
224 Cardiac Surgery with a comprehensive methodology for assessment of adult cardiac surgery  
225 quality of care. Among the quality indicators are the possibility of temporal evaluation (pre-,  
226 intra- and postoperative) and consideration for structures, processes, and outcomes. The  
227 quality scores should be interpretable and actionable by providers. The design of  
228 comprehensive quality measures involves clinical, health policy, and statistical  
229 considerations<sup>9</sup>. Due to several limitations, there is a high demand for the development of  
230 data quality analysis tools in healthcare. The use of these tools to assure completeness,  
231 reliability, and accuracy are essential to the validity in observational research, considering  
232 that those studies already have possible bias.

233 Lauricella et al, 2018<sup>6</sup>, published a data quality analysis on a similar initiative of  
234 developing such a database. The Paulista Lung Cancer Registry (PLCR), also developed by  
235 InCor, cannot be directly compared with REPLICCAR II, because the parameters are  
236 different. However, we can analyze some parameters, such as the COM. Within their 511  
237 analyzed records, 21 of 105 variables (20%) had a COM < 0.90%. In our study, 7 of the 30

238 variables (23.33%) had the same results. The work by Salati et al, 2011<sup>1</sup>, showed that 5 of  
239 15 variables (33.33%) selected for the completeness study had COM < 90%. This way, we  
240 can consider that, in this parameter, the REPLICCAR II study showed excellent results.  
241 Considering that recent works are proposing this parameter as one of the most accessible for  
242 initial data quality studies<sup>1</sup>, our study is within this trend.

243 In analyzing the direct audit results, it is important to remember that ICC considers  
244 the fact that close numerical values might be concordant even though they are different. This  
245 has important implications in a clinical study because different values within a close range  
246 (normal variance) will show good ICC values. Considering that different researchers (or even  
247 the auditor) may collect exam values from different dates for the same subject, these values  
248 may show good ICC results in the statistical analysis<sup>6</sup>. We can say that our ICC had good  
249 values, with only 2 of 15 variables (13.33%) showing an ICC of less than 0.90. Our lowest  
250 ICC value was 0.70 for preoperative hemoglobin. In Lauricella et al, 2018, the same values  
251 were found in 5 of their 12 numerical variables (41.66%), and their lowest ICC value was  
252 0.51 for time from first symptom. The comparison, however, cannot be applied directly  
253 between our groups, because completely different parameters were studied in each work.

254 However, we must remember that these results do not present improvement  
255 strategies for the quality of the records because we cannot pinpoint the data collection error  
256 solely based on these parameters. Newly proposed parameters, such as the ADQ, may  
257 provide faster, more practical and low-cost analysis of generic data quality. Another  
258 evaluation that could be performed was the ADQ by each center, which could then be used  
259 to guide the centers about the strengths and weaknesses of their study variables and thus  
260 help them improve the quality of their data.

261 In the United States, there has been much discussion about the applicability of Big  
262 Data analysis to Healthcare. There is still great reluctance to adhere to the adoption of  
263 electronic systems in clinical practice, usually remaining restricted to administrative and  
264 financial analyzes<sup>11</sup>. In 2009, the Health Information Technology for Economic and Clinical  
265 Health Act (HITECH) invested between US\$ 14b and US\$ 27b in the adoption of electronic

266 systems in hospitals<sup>9</sup>. Consequently, the generation of massive data presents its own  
267 analysis challenges, especially when it comes to information security. In the United States, it  
268 is estimated that in 2011 there were already 150 exabytes of health-related information<sup>12</sup>.  
269 Such reality clearly fits Big Data systems, already well established in different industries and  
270 with clearly effective results, like Google's search engine, Amazon's buying suggestions, and  
271 even in election campaigns<sup>13</sup>.

272 In Brazil, the Ministry of Health, through the Research Program of Sistema Único de  
273 Saúde (PPSUS), is an example of not only the potential of applying technology and  
274 databases in healthcare, but also the relevance of initiatives like REPLICCAR II. In São  
275 Paulo, Brazil's largest city, there is a large concentration of big centers, researchers, skilled  
276 labor, and a massive convergence of people from various regions of the country who come to  
277 seek care in its hospitals. Thus, although it is a registry from the State of São Paulo, the  
278 diversity of the served population allows for greater data refinement. In the end, with  
279 investment and the management of a single project, we can obtain applicable analysis to  
280 different subpopulations, as recommended by the PPSUS Technical Guidelines, 5th edition,  
281 of 2014. This work also points to the importance of changing the health sciences data  
282 paradigm. By providing a qualified database, such as the STS or ESTS, the personal cost of  
283 exposing your data comes back in the long term by providing reliable community data, thus  
284 allowing the elaboration of larger and safer guidelines.

285 For decades, cardiac surgeons have collected and analyzed data systematically to  
286 continually improve outcomes in quality of care<sup>9</sup>. Health information technology (IT) has the  
287 potential to improve individuals' health and provide better clinical performance, better  
288 healthcare quality, lower costs, and greater involvement of patients in their own health  
289 services<sup>9</sup>. The growing development of Big Data and therefore its use in healthcare science  
290 seems inevitable, and many initiatives are showing a prospective future in this area.  
291 However, if we cannot ensure the quality of the data in the analysis<sup>15</sup>, we will not succeed in  
292 deriving trustworthy and, ultimately, valid conclusions, regardless of the analytical model we  
293 may use<sup>16</sup>.

294           Among the benefits of artificial intelligence (AI) are (i) better knowledge of the general  
295 population, (ii) the comparison of patient samples in each institution, (iii) the evaluation of  
296 association and risk with predictive instruments for outcomes of interest, (iv) the elaboration  
297 of risk scores, (v) better planned strategies for the improvement of quality and safety in  
298 healthcare, and (vi) protocols based on reality and the available resources for each  
299 population subgroup.

300

### 301 **Limitations**

302 1. As expected from such a pioneering project, there were many challenges regarding the  
303 education of the professionals engaged in the collection of data and to ensure REPLICCAR  
304 data quality, as shown by the unexpected discrepancies in our results. Considering solely the  
305 analysis made ( $\kappa$  coefficient and ICC), we cannot point out the causes of these errors.

306 2. We found satisfactory concordance and ICC, but these results only show the capacity of  
307 the investigators to collect data in the first phase of the study (6 months after beginning).  
308 Considering that most centers designated their medical residents for the collection of data,  
309 we cannot ensure the long-term adherence of the centers and professionals to our  
310 proposition, because it is expected that a short- to medium-term rotation of these  
311 professionals will occur.

312 3. The work was limited due to its financial and human resources. Thus, a direct audit or a  
313 more restricted follow-up of the centers was impracticable. Nonetheless, faced with this, our  
314 team looked further for new perspectives in the data quality analysis, such as the ADQ, thus  
315 contributing to the development of this area.

316 4. This work points out that there is still a long way to go before developing a Brazilian  
317 national database comparable to the STS or the ESTS databases. We still cannot assure the  
318 adherence of professionals, researchers, healthcare centers, as well as the government to  
319 the promotion and adoption of electronic registries; nonetheless, the development of a  
320 consensus for a broad database is growing.

321

322 This work shows the seriousness and commitment to this project, already concerned not only  
323 with its development and implementation, but also the quality of its data.

324

## 325 **Conclusion**

326 The reliability and completeness of medical records are essential to the validity and  
327 reliability of the results obtained. Indirect auditing gave clear directions for data improvement,  
328 without the need to recollect a sample to evaluate concordance.

329 The best strategies based on our experience to improve data quality in a way the  
330 information can be reviewed in the moment the investigator is filling data, are periodical  
331 reports with detailed feedback and, above all, to maintain a sound scientific partnership with  
332 regular meetings to integrate well with working groups in each institution.

333 Findings of a discrepancy between the data only reinforces the need for quality-  
334 oriented statistical studies, because it directly influences the validity, the analysis, and  
335 conclusions performed in research. In places where such studies and their application are  
336 still underdeveloped, like in Brazil, studies in this field become even more indispensable.  
337 Focus on data quality is a sure factor that ultimately leads to a more efficient and safer  
338 healthcare system, and it will surely play an increasing major role in its development. The  
339 main objective of the present work was to implement improvement actions in a way that  
340 guarantees safety and validity to the results, as well as allowing feedback on REPLICCAR II  
341 itself. As an STS-based database, this project could provide the basis for a wider and reliable  
342 quality-focused program, with the prospect of a positive impact on clinical outcomes.

343 Our experience reinforces the importance of training, incentives, and standardization  
344 of the staff who collect the data and fill out the forms, which brings greater benefits and  
345 substantially lower costs than the direct auditing with the still traditional Raters Agreement  
346 Analysis. The latter demands more investigators to collect the data at each institution,  
347 extensive data analysis periods, and results related to the understanding of concepts and  
348 criteria. The indirect auditing was more practical in elaborating strategies for data quality  
349 improvement. ADQ considers the completeness and reliability of each variable in the study

350 and shows the best parameters of data quality in prospective observational studies. It is  
351 therefore expected that it will attract more attention in studies yet to come, although there is  
352 still a lot of room for research in parameters for measuring data quality in the healthcare  
353 sciences.

354

355 **Funding:** This work was supported by the Programa de Pesquisa do SUS (PPSUS).

356 **Conflict of interest:** none declared.

357 **Acknowledgements:** REPLICCAR II Study Group, Proofreading by Mr. Rafael Frate.



359 **References**

- 360 1. Salati M, Brunelli A, Dahan M, et al. Task-independent metrics to assess the data quality of  
361 medical registries using the European Society of Thoracic Surgeons (ESTS) Database. *Eur J*  
362 *Cardiothoracic Surg* 2011;40(1):91–8.
- 363 2. Zhang R, Jayawardene V, Indulska M, et al. A data driven approach for discovering data  
364 quality requirements. *ICIS 2014 Proc.* 2014;1–10.
- 365 3. Salati M, Falcoz PE, Decaluwe H, et al. The European thoracic data quality project: An  
366 Aggregate Data Quality score to measure the quality of international multi-institutional  
367 databases. *Eur J Cardiothoracic Surg* 2016;49(5):1470–5.
- 368 4. Dreyer NA, Bryant A, Velentgas P. The GRACE Checklist: A validated assessment tool for  
369 high quality observational studies of comparative effectiveness. *J Manag Care Spec Pharm*  
370 2016;22(10):1107–13.
- 371 5. Seder CW, Falcoz PE, Salati M. International General Thoracic Surgery Database  
372 Collaboration. *Thorac Surg Clin.* 2017;27(3):303–13.
- 373 6. Lauricella LL, Costa PB, Salati M, et al. Measurement of the inter-rater reliability rate is  
374 mandatory for improving the quality of a medical database: experience with the Paulista Lung  
375 Cancer Registry. *J Am Coll Surg* 2018;226(6):1128–36.
- 376 7. Shweta, Bajpai R, Chaturvedi H. Evaluation of inter-rater agreement and inter-rater  
377 reliability for observational data: an overview of concepts and methods. *J Indian Acad Appl*  
378 *Psychol* 2015;41(3 [Special Issue]):20–7.
- 379 8. Koo TK, Li MY. A guideline of selecting and reporting intraclass correlation coefficients for  
380 reliability research. *J Chiropr Med* 2016;15(2):155–63.
- 381 9. Shahian DM, Edwards FH, Ferraris VA, et al. Quality measurement in adult cardiac  
382 surgery: Part 1-conceptual framework and measure selection. *Ann Thorac Surg* 2007;83(4  
383 SUPPL).

- 384 10. Buntin M, Burke M, Hoaglin M, Blumenthal D. The benefits of health information  
385 technology: A review of the recent literature shows predominantly positive results. *Health Aff*  
386 2011;30(3):464–71.
- 387 11. Audet AM, Doty MM, Peugh J, et al. Information technologies: when will they make it into  
388 physician's' black bags? *MedGenMed* 2004;6(4):2.
- 389 12. Raghupathi W, Raghupathi V. Big data analytics in healthcare: promise and potential.  
390 *Heal Inf Sci Syst* 2014;2(1):3.
- 391 13. Murdoch TB, Detsky AS. The inevitable application of big data. *JAMA*. 2014;309(13)  
392 :1351.
- 393 14. Shahian DM, Torchiana DF, Engelman DT, et al. Mandatory public reporting of cardiac  
394 surgery outcomes: The 2003-2014 Massachusetts experience. *J Thorac Cardiovasc Surg*  
395 2019;158(1):110-24.
- 396 15. Wang RY, Strong DM. Beyond accuracy: what data quality means to data consumers. *J*  
397 *Manage Inform Syst* 1996;12:5-33.
- 398 16. Calvert M, Thwaites R, Kyte D, Devlin N. Putting patient-reported outcomes on the 'Big  
399 Data Road Map'. *J R Soc Med* 2015;108(8):299-303.
- 400 17. Shahian DM, O'Brien SM, Normand SL, et al. Association of hospital coronary artery  
401 bypass volume with processes of care, mortality, morbidity, and the Society of Thoracic  
402 Surgeons composite quality score. *J Thorac Cardiovasc Surg* 2010;139(2):273-82.
- 403 18. Kurlansky PA, Argenziano M, Dunton R, et al. Quality, not volume, determines the  
404 outcome of coronary artery bypass surgery in a university-based community hospital  
405 network. *J Thorac Cardiovasc Surg* 2012;143(2):287-93.
- 406 19. Miyata M, Motomura N, Murakami A, Takamoto S. Effect of benchmarking projects on  
407 outcomes of coronary artery bypass graft surgery: Challenges and prospects regarding the  
408 quality improvement initiative. *J Thorac Cardiovasc Surg* 2012;143(6):1364-9.
